# Supplementary material for: Development of a novel chronic kidney disease mouse model to evaluate the progression of hyperphosphatemia and associated mineral bone disease
Source: PubMed Central journal article supplement (PMC5440375; doi:10.1038/s41598-017-02351-6), 2017-05-22
Supplement: 41598_2017_2351_MOESM1_ESM.pdf [file 41598_2017_2351_MOESM1_ESM.pdf]

## Development of a novel chronic kidney disease mouse model to evaluate the progression of hyperphosphatemia and associated mineral bone disease

Takashi Tani<sup>1, 2</sup>, Hideo Orimo<sup>2</sup>, Akira Shimizu<sup>3</sup>, Shuichi Tsuruoka<sup>1</sup>

### Supplementary Figures:

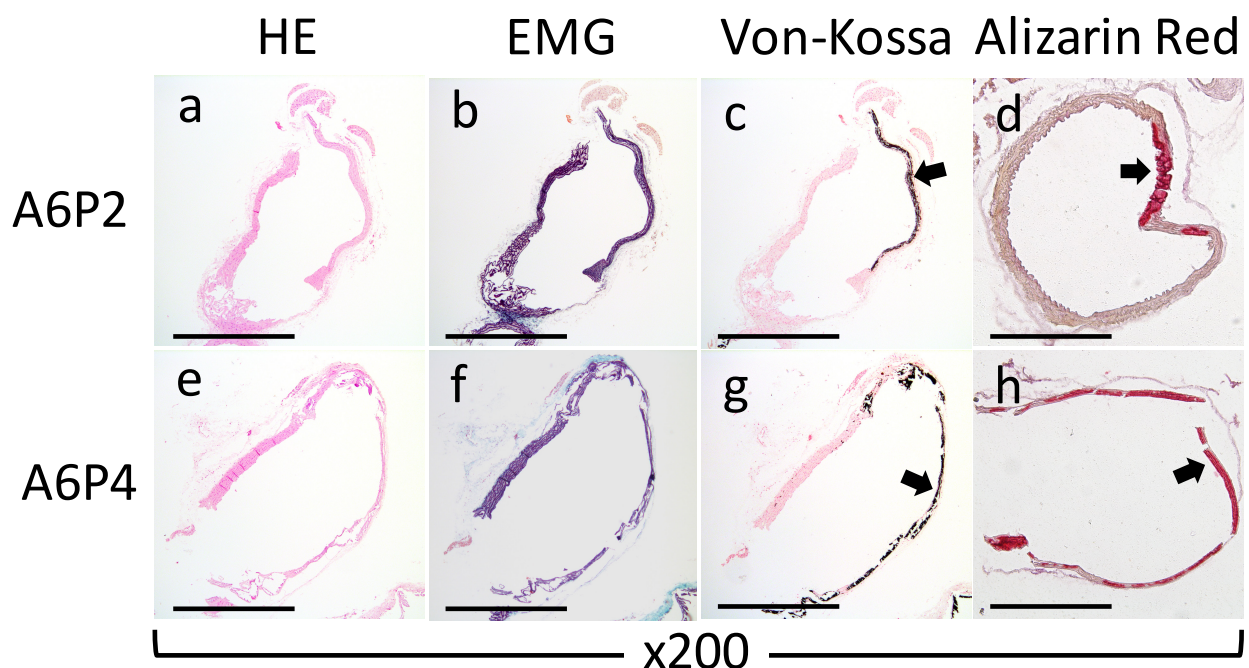

**Supplementary Figure S1. Micrographs of H&E, EMG, Von kossa and Alizarin Red stained sections of the thoracic aorta from A6P2 and A6P4 mice.** Sections of the thoracic aorta for A6P2 (a-d) and A6P4 (e-h) groups are shown. Medial arterial calcification was observed, as Von kossa and Alizarin Red staining positive lesion, in part of A6P2 and A6P4 groups` mice (c,d,g,h, black arrow). Scale bar, 500  $\mu$ m; H&E, hematoxylin and eosin staining; EMG, elastica Masson-Goldner staining.

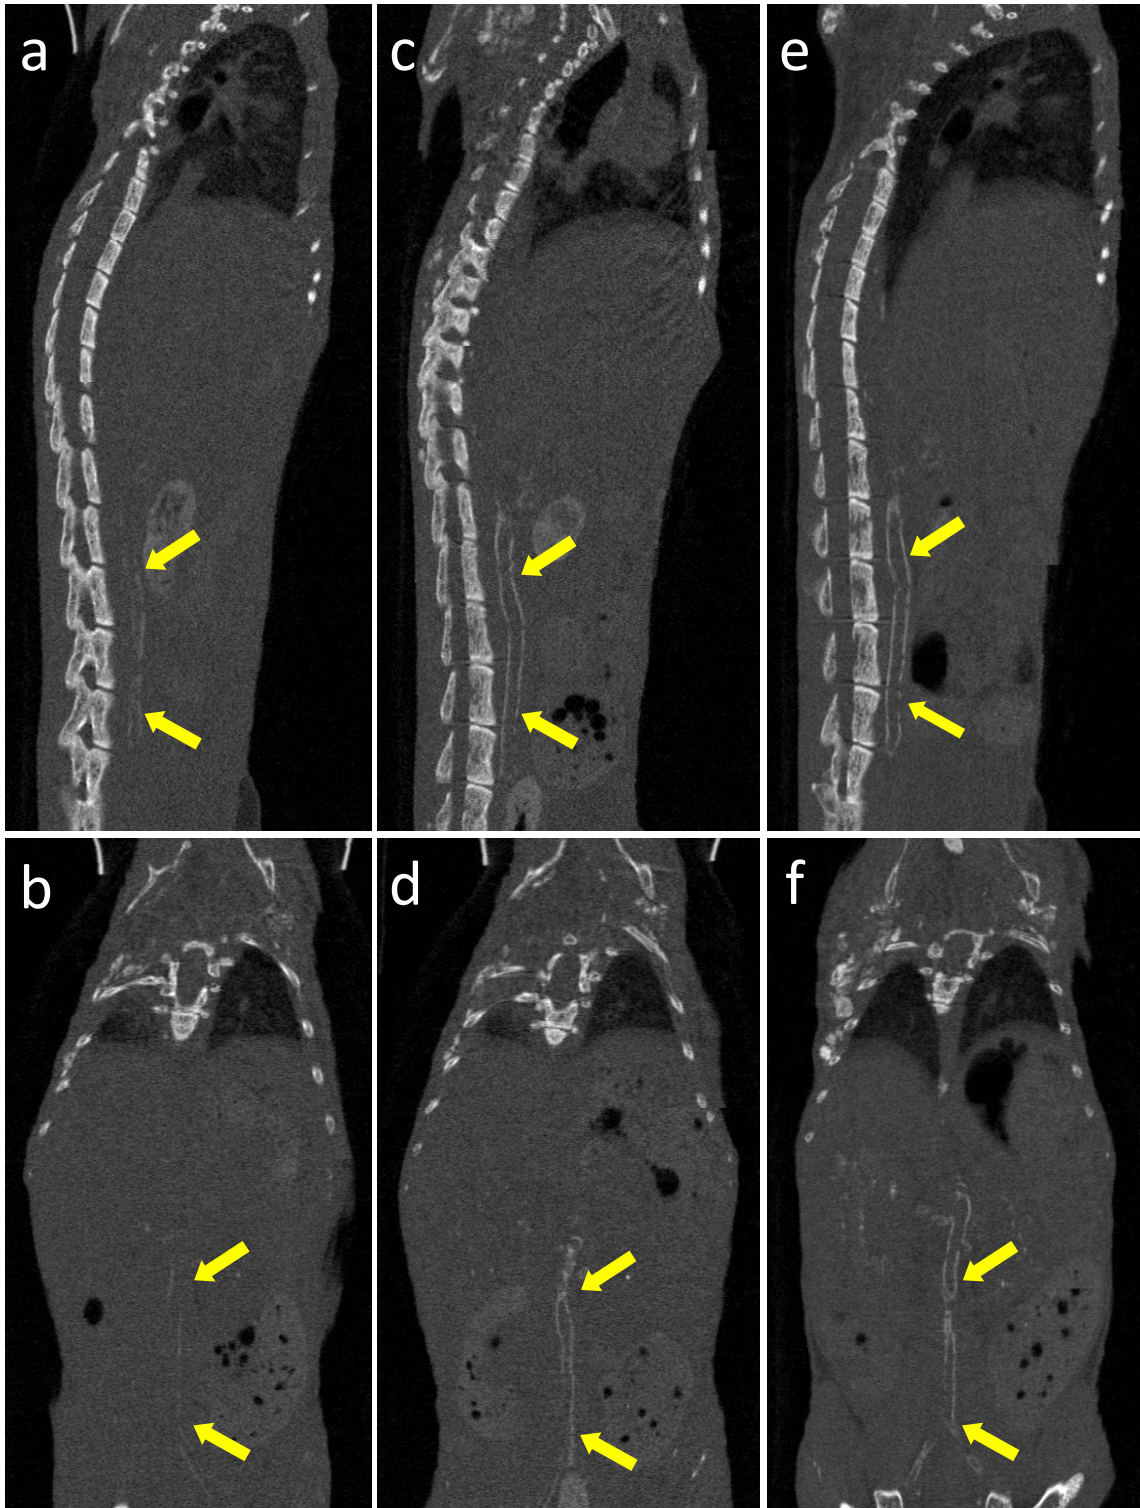

**Supplementary Figure S2. Computed tomography imaging of the identical mouse between 16 and 20 weeks of age.** Computed tomography (CT) imaging was performed repeatedly for identical mouse every other week between 14 and 20 weeks of age. CT images were reconstructed as sagittal plane images (**a,c,e**) and coronal plane images (**b,d,f**). Vascular calcification became prominent at 16 weeks of age, i.e. two-weeks after phosphorus loading (**a, b**, arrows). Calcification became severer as a time-dependent manner at 18 weeks of age (**c, d**, arrows) and 20 weeks of age (**e, f**, arrows).
